# Supplementary material
Source: PubMed Central journal article supplement (PMC7365589)
Supplement: NIHMS1594188-supplement-Suppl_Fig_1-2_tables_5-6.pdf [file NIHMS1594188-supplement-Suppl_Fig_1-2_tables_5-6.pdf]

## Supplementary Figure S1

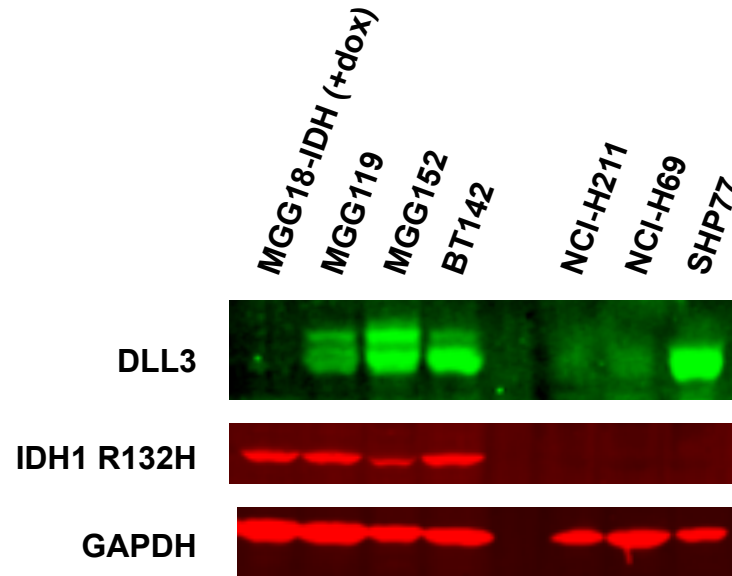

**Supplementary Figure S1. Western blot using antibodies against DLL3, the IDH1 R132H mutant enzyme, and GAPDH.** Lane labels: MGG18-IDH (+dox): An *IDH* wildtype patient-derived glioblastoma tumorsphere line (MGG18) engineered with a tetracycline-inducible IDH1 R132H gene (MGG18-IDH), cultured with doxycycline for 72 hours; MGG119: An patient-derived glioblastoma tumorsphere line with endogenous IDH1 R132H. MGG152: An patient-derived glioblastoma tumorsphere line with endogenous IDH1 R132H. BT142: a publically available patient-derived glioblastoma tumorsphere line with endogenous IDH1 R132H (ref. 48); NCI-H211: cell line known to lack DLL3 expression (negative control). NCI-H69: Cell line with low to medium DLL3 expression (control). SHP77: Cell line with high DLL3 expression (positive control).

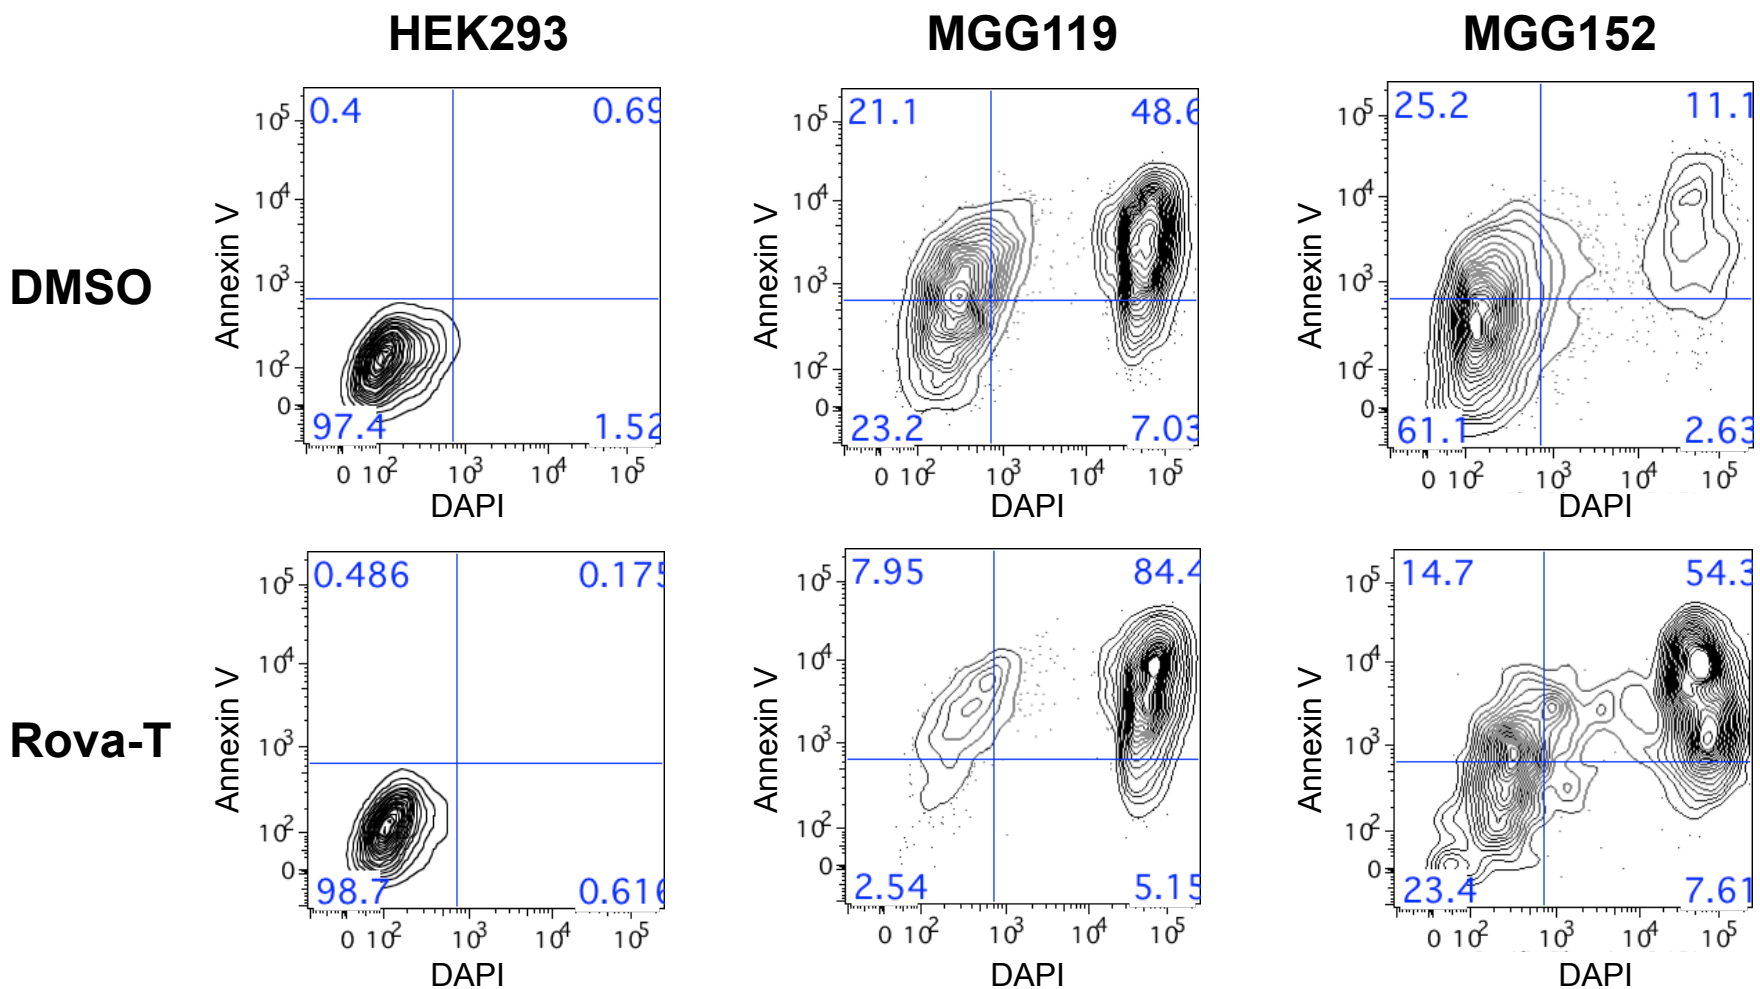

**Supplementary Figure S2. Rova-T induces apoptosis in DLL3-expressing *IDH* mutant glioma tumorspheres.** HEK293 (DLL3 negative, left column), MGG119 (DLL3 expressing *IDH* mutant patient-derived glioma tumorsphere, middle column) and MGG152 (DLL3 expressing *IDH* mutant patient-derived glioma tumorsphere, right column) were treated with DMSO (top row) or 100 pM of SC16LD6.5 (Rova-T) (bottom row) for 7 days. Apoptosis was then measured by staining with Annexin V according to the manufacturer's instructions (BD Pharmingen) in combination with DAPI. Apoptotic cells (top right quadrant) were measured using a FACScan flow cytometer (BD Biosciences), and the relative cell distribution (shown as percentage in the quadrants, in blue) was analyzed using Flo Jo software (FloJo, LLC).

**Supplementary Table S5. DLL3 Immunohistochemistry Summary (Discovery Set)**

|                          | n  | H-score<br>median<br>(95% CI) | P                                      | DLL3+ cells<br>median<br>(95% CI) | P                                     | DLL3+ tumor cells |      |       |        |      |
|--------------------------|----|-------------------------------|----------------------------------------|-----------------------------------|---------------------------------------|-------------------|------|-------|--------|------|
|                          |    |                               |                                        |                                   |                                       | 0%                | 1-5% | 6-49% | 50-79% | ≥80% |
| <b>IDH wildtype GBM</b>  | 17 | 15<br>(0-50)                  | <b>0.0007</b><br>(3 major groups)      | 15%<br>(5-40%)                    | <b>0.002</b><br>(3 major groups)      | 2                 | 6    | 5     | 4      | 0    |
| <i>MGMT</i> status       |    |                               |                                        |                                   |                                       |                   |      |       |        |      |
| Unmethylated             | 4  | 4.5<br>(0-15)                 |                                        | 5%<br>(0-15%)                     |                                       | 1                 | 2    | 1     | 0      | 0    |
| Methylated               | 12 | 27.5<br>(0-75)                | 0.11                                   | 25%<br>(5-60%)                    | 0.12                                  | 1                 | 3    | 4     | 4      | 0    |
| Classifier Subclass      |    |                               |                                        |                                   |                                       |                   |      |       |        |      |
| Mesenchymal              | 6  | 0<br>(0-20)                   |                                        | 5<br>(0-20)                       |                                       | 2                 | 3    | 1     | 0      | 0    |
| Non-mesenchymal          | 10 | 42.5<br>(9-100)               | <b>0.019</b>                           | 35%<br>(5-65)                     | <b>0.004</b>                          | 0                 | 2    | 4     | 4      | 0    |
| <b>IDH mutant glioma</b> | 19 | 250<br>(50-270)               | <b>0.0014</b><br>(vs <i>IDHwt</i> GBM) | 80%<br>(40-90%)                   | <b>0.003</b><br>(vs <i>IDHwt</i> GBM) | 3                 | 1    | 2     | 2      | 11   |
| 1p/19q codeleted         | 9  | 270<br>(170-300)              |                                        | 90%<br>(65-90%)                   |                                       | 0                 | 0    | 1     | 1      | 7    |
| Non-codeleted            | 10 | 85<br>(0-260)                 | <b>0.003</b>                           | 55%<br>(0-80%)                    | <b>0.003</b>                          | 3                 | 1    | 1     | 1      | 4    |
| <b>Glioma variants</b>   | 10 | 0 (0-50)                      |                                        | 0.5%<br>(0-70%)                   |                                       | 5                 | 2    | 1     | 1      | 1    |

Immunostains were scored by two independent teams and prior to determination of the molecular status of the tumors. The Abbvie Stemcentrx team generated H-scores and the NYU team reported the percent of DLL positive (DLL3+) tumor cells.

Abbreviations: *IDHwt*, *IDH* wildtype

**Supplementary Table S6. DLL3 Immunohistochemistry Summary (Validation Set)**

|                                     | n  | H-score<br>median<br>(95% CI) | P                                  | DLL3+<br>cells<br>median<br>(95% CI) | P                                   | DLL3+ tumor cells |      |       |        |      |
|-------------------------------------|----|-------------------------------|------------------------------------|--------------------------------------|-------------------------------------|-------------------|------|-------|--------|------|
|                                     |    |                               |                                    |                                      |                                     | 0%                | 1-5% | 6-49% | 50-79% | ≥80% |
| <b>IDH wildtype GBM</b>             | 26 | 10<br>(1-20)                  |                                    | 5%<br>(1-10%)                        |                                     | 6                 | 8    | 10    | 2      | 0    |
| <i>MGMT status</i>                  |    |                               |                                    |                                      |                                     |                   |      |       |        |      |
| Unmethylated                        | 14 | 15<br>(1-30)                  |                                    | 7.5%<br>(1-10%)                      |                                     | 2                 | 5    | 7     | 0      | 0    |
| Methylated                          | 10 | 6<br>(0-30)                   | 0.29                               | 3%<br>(0-10%)                        | 0.31                                | 4                 | 3    | 2     | 1      | 0    |
| <i>Classifier Subclass</i>          |    |                               |                                    |                                      |                                     |                   |      |       |        |      |
| Mesenchymal                         | 6  | 0.5<br>(0-30)                 |                                    | 0.5%<br>(0-10)                       |                                     | 3                 | 1    | 2     | 0      | 0    |
| Non-mesenchymal                     | 17 | 10<br>(2-20)                  | 0.08                               | 5%<br>(1-10)                         | 0.14                                | 2                 | 7    | 6     | 2      | 0    |
| <b>IDH mutant glioma*</b>           | 22 | 130<br>(100-180)              | <b>0.0000043</b><br>(vs IDHwt GBM) | 60%<br>(50-70%)                      | <b>0.00000017</b><br>(vs IDHwt GBM) | 2                 | 0    | 2     | 15     | 3    |
| 1p/19q codeleted                    | 6  | 180<br>(100-170)              |                                    | 60%<br>(50-90%)                      |                                     | 0                 | 0    | 0     | 5      | 1    |
| Non-codeleted                       | 10 | 150<br>(80-210)               | 0.59                               | 65%<br>(40-80%)                      | 0.33                                | 0                 | 0    | 2     | 6      | 2    |
| <b>Recurrent IDH mutant glioma*</b> | 14 | 210<br>(80-240)               | 0.085<br>(vs non-rec IDHmut)       | 70%<br>(50-80%)                      | 0.16<br>(vs non-rec IDHmut)         | 0                 | 0    | 2     | 8      | 4    |
| <i>Paired tumors</i>                |    |                               |                                    |                                      |                                     |                   |      |       |        |      |
| Initial                             | 11 | 180<br>(100-210)              |                                    | 60%<br>(50-70%)                      |                                     | 0                 | 0    | 0     | 10     | 1    |
| Recurrent                           | 11 | 210<br>(50-240)               | 0.61<br>(vs initial)               | 70%<br>(50-80%)                      | 0.77<br>(vs initial)                | 0                 | 0    | 1     | 7      | 3    |

Immunostains were scored by two NYU neuropathologists who reported the percent of DLL positive (DLL3+) tumor cells.

Abbreviations: IDHwt, IDH wildtype; IDHmut, IDH mutant; non-rec, non-recurrent;

\*9 IDH mutant patients, including 3 paired recurrences (total 12 tumors) had unknown 1p/19q chromosome status.
